# Supplementary material for: The impact of rumen microbial composition on apparent digestibility, rumen fermentation and metabolism in Sanhe cows and Holstein cows of different parities under identical dietary conditions
Source: Front Vet Sci. 2025 Feb 17;11:1463209. doi: 10.3389/fvets.2024.1463209 (PMC11873279; doi:10.3389/fvets.2024.1463209)
Supplement: Supplementary file 2 [file Table_2.xlsx]

## Sheet: Table S1
Table S1. Summary of sequence data generated from rumen samples of Sanhe cows
Sample	RawReads	CleanReads	Clean_Q20(%)	Clean_Q30(%)	Clean_GC(%)	Contigs	N50 len.(bp)
S1.1	113206608	100021154	100	99.74	39	872851	937
S1.2	104669032	92039514	100	99.75	42	613670	1194
S1.3	82637184	73989962	100	99.75	46	597766	1177
S1.4	90885006	81517672	100	99.75	39	617802	1010
S1.5	92468652	81645624	100	99.74	38	683450	925
S1.6	68418164	60843300	100	99.75	38	444388	1061
S1.7	87365932	78320276	100	99.75	36	845429	919
S1.8	65702824	58850548	100	99.75	46	460837	1137
S1.9	71959228	64010658	100	99.68	46	555021	950
S1.10	74429070	66202336	100	99.66	46	606812	942
S2.1	69976564	61828494	100	99.67	48	378644	1506
S2.2	70626024	62411012	100	99.66	44	553215	997
S2.3	68977966	61554776	100	99.69	45	592206	940
S2.4	69111538	61022360	100	99.69	43	633733	943
S2.5	72062054	63441806	100	99.68	41	580912	893
S2.6	65984468	58855650	100	99.68	45	522757	1023
S2.7	68579524	60395062	100	99.69	45	608933	1011
S2.8	66345746	58833920	100	99.68	44	565386	910
S2.9	71368612	57158368	100	99.67	45	533181	818
S3.1	136431886	117937562	100	99.75	43	828484	1104
S3.2	102580680	91208202	100	99.75	47	635158	1251
S3.3	74233206	65821210	100	99.67	42	607618	926
S3.4	80603950	69911988	100	99.67	46	567440	1012
S3.5	70342738	62447114	100	99.68	43	532911	1002
S3.6	69539848	60871150	100	99.67	42	557275	956
S3.7	69914682	61409390	100	99.67	44	592224	942
S3.8	69619828	61731474	100	99.68	44	595640	965
S3.9	75040786	66813730	100	99.67	47	490064	1230
S3.10	72252118	61505132	100	99.67	44	623795	866
S4.1	90393030	79617076	100	99.75	46	543874	1234
S4.2	109390140	96820750	100	99.75	43	884466	939
S4.3	78026428	68806838	100	99.69	47	514253	1216
S4.4	68619210	61675318	100	99.66	48	330765	1599
S4.5	67802690	60576006	100	99.69	46	527071	1123
S4.6	71127780	62969712	100	99.68	44	580995	917
S4.7	66211124	59340094	100	99.69	47	537653	1073
S4.8	75851848	66318938	100	99.67	43	662866	908
S4.9	76707420	67188666	100	99.66	46	621614	1048
S4.10	75402860	67069990	100	99.67	48	458367	1378
Total	3074866448	2712982832	3900	3888.22	1716	22959526	40982
Total	3074866448	2712982832	3900	3888.22	1716	22959526	40982
Mean	7.88427e+07	6.95637e+07	100	99.7	44	588706	1050.82
SD	1.56478e+07	1.368e+07	0	0.04	2.96	116852	172.51
SEM	2.50566e+06	2.19055e+06	0	0.01	0.47	18711.3	27.62

## Sheet: Table S2
Table S2. Summary of sequence data generated from rumen samples of Holstein cows
Sample	RawReads	CleanReads	Clean_Q20(%)	Clean_Q30(%)	Clean_GC(%)	Contigs	N50 len.(bp)
H1.1	171531552	105598042	100	99.69	43	651601	957
H1.2	98127130	86643450	100	99.74	44	754610	974
H1.3	99357064	87099094	100	99.74	45	676023	1123
H1.4	112125780	97543390	100	99.75	46	839470	1084
H1.5	128355104	111384488	100	99.75	36	998082	929
H1.6	144362198	124334644	100	99.75	46	942823	1133
H1.7	86501528	77434092	100	99.74	40	733539	949
H1.8	98980846	87201146	100	99.75	45	784911	965
H1.9	108159548	94667892	100	99.73	38	1041795	878
H1.10	76477056	67169198	100	99.66	46	570275	1124
H2.2	119306392	104593676	100	99.74	44	878402	1075
H2.3	118251230	102848564	100	99.73	42	1007285	943
H2.4	77550514	69198578	100	99.75	37	704112	936
H2.6	90883566	80965502	100	99.75	45	753503	1029
H2.7	80527674	63557310	100	99.69	39	594605	925
H2.9	71066480	62252504	100	99.69	46	572671	856
H3.1	83501852	75320342	100	99.77	47	560407	1146
H3.2	86401364	71988398	100	99.83	48	486302	1168
H3.3	91137276	76469516	100	99.82	47	400607	1463
H3.4	86935240	73122446	100	99.81	47	537145	1171
H3.5	79353988	66676314	100	99.81	46	384959	1397
H3.6	87014528	71259636	100	99.82	46	501186	1383
H3.7	70738272	62970250	100	99.66	47	445666	1249
H3.9	71191540	63064362	100	99.63	46	577705	977
H3.10	80218798	69585400	100	99.69	41	704219	911
H4.3	74912888	66141106	100	99.73	43	574205	1006
H4.4	79949356	71940620	100	99.75	42	618136	930
H4.5	93175298	78484616	100	99.81	46	666488	1104
H4.6	73815248	65098466	100	99.53	48	363281	1323
H4.7	76682470	67743428	100	99.67	44	565933	1081
H4.8	118251230	102848564	100	99.73	42	593208	945
H4.9	112125780	97543390	100	99.75	46	521754	1028
H4.10	76477056	67169198	100	99.66	46	577908	1245
Total	3123445846	2669917622	3300	3291.12	1454	21582816	35407
Mean	9.46499e+07	8.09066e+07	100	99.73	44.06	654025	1072.94
SD	2.31348e+07	1.67333e+07	0	0.06	3.18	178070	158.56
SEM	4.02726e+06	2.9129e+06	0	0.01	0.55	30998	27.6

## Sheet: Table S3
Table S3. KEGG orthologies (KO) number annotated for Sanhe cows
S Group	#Unigene	EC_number	Description
K21572	85376	.	susD; starch-binding outer membrane protein, SusD/RagB family
K03088	47113	.	rpoE; RNA polymerase sigma-70 factor, ECF subfamily
K07133	55077	.	K07133; uncharacterized protein
K01992	36462	.	ABC-2.P; ABC-2 type transport system permease protein
K07497	26701	.	K07497; putative transposase
K01990	33714	.	ABC-2.A; ABC-2 type transport system ATP-binding protein
K07486	18679	.	K07486; transposase
K07315	29739	EC:3.1.3.3	rsbU_P; phosphoserine phosphatase RsbU/P
K13412	25686	EC:2.7.11.1	CPK; calcium-dependent protein kinase
K02004	33239	.	ABC.CD.P; putative ABC transport system permease protein
K05349	30216	EC:3.2.1.21	bglX; beta-glucosidase
K03574	22567	EC:3.6.1.55	mutT, NUDT15, MTH2; 8-oxo-dGTP diphosphatase
K02003	26157	.	ABC.CD.A; putative ABC transport system ATP-binding protein
K06921	25603	.	K06921; uncharacterized protein
K01897	28880	EC:6.2.1.3	ACSL, fadD; long-chain acyl-CoA synthetase
K07484	16332	.	K07484; transposase
K03496	18343	.	parA, soj; chromosome partitioning protein
K03086	22359	.	rpoD; RNA polymerase primary sigma factor
K02078	10208	.	acpP; acyl carrier protein
K18954	17260	.	pobR; AraC family transcriptional regulator, transcriptional activator of pobA

## Sheet: Table S4
Table S4. KEGG orthologies (KO) number annotated for Group Holstein cows
H Group	#Unigene	EC_number	Description
K21572	85376	.	susD; starch-binding outer membrane protein, SusD/RagB family
K03088	47113	.	rpoE; RNA polymerase sigma-70 factor, ECF subfamily
K07133	55077	.	K07133; uncharacterized protein
K07497	26701	.	K07497; putative transposase
K01992	36462	.	ABC-2.P; ABC-2 type transport system permease protein
K01990	33714	.	ABC-2.A; ABC-2 type transport system ATP-binding protein
K07486	18679	.	K07486; transposase
K07315	29739	EC:3.1.3.3	rsbU_P; phosphoserine phosphatase RsbU/P
K07484	16332	.	K07484; transposase
K02004	33239	.	ABC.CD.P; putative ABC transport system permease protein
K02003	26157	.	ABC.CD.A; putative ABC transport system ATP-binding protein
K03574	22567	EC:3.6.1.55	mutT, NUDT15, MTH2; 8-oxo-dGTP diphosphatase
K03655	23992	EC:3.6.4.12	recG; ATP-dependent DNA helicase RecG
K07485	7622	.	K07485; transposase
K06921	25603	.	K06921; uncharacterized protein
K03496	18343	.	parA, soj; chromosome partitioning protein
K05349	30216	EC:3.2.1.21	bglX; beta-glucosidase
K03086	22359	.	rpoD; RNA polymerase primary sigma factor
K13412	25686	EC:2.7.11.1	CPK; calcium-dependent protein kinase
K01897	28880	EC:6.2.1.3	ACSL, fadD; long-chain acyl-CoA synthetase
